# Supplementary material
Source: PubMed Central journal article supplement (PMC7121761)
Supplement: NEJMoa2005412_appendix.pdf [file NEJMoa2005412_appendix.pdf]

## Supplementary Appendix

This appendix has been provided by the authors to give readers additional information about their work.

Supplement to: McMichael TM, Currie DW, Clark S, et al. Epidemiology of Covid-19 in a long-term care facility in King County, Washington. *N Engl J Med*. DOI: 10.1056/NEJMoa2005412

Table of Contents

Page 2: Members of the Public Health – Seattle & King County, EvergreenHealth, and CDC COVID-19 Investigation Team

Members of the Public Health – Seattle & King County, EvergreenHealth, and CDC COVID-19 Investigation Team: Meaghan S. Fagalde, MPH, SKC; Jennifer L. Lenahan, MPH, SKC; Emily B. Maier, MPH, SKC; Julia E. Hood, PhD, SKC; Kaitlyn J. Sykes, MPH, SKC; Grace Hatt, MPH, SKC; Holly J. Whitney, MPH, SKC; Melinda Huntington-Frazier, MSN, SKC; Elysia Gonzales, MPH, SKC; Laura A. Mummert, BS, SKC; Hal Garcia Smith, SKC; Steve Stearns, AAS, SKC; Eileen Benoliel, BSN, SKC; Shelly McKeirnan, MPH, SKC; Jennifer L. Morgan, MSN, SKC; Daniel Smith, MPH, SKC; Michaela Hope, PHN, SKC; Noel Hatley, MPH, SKC; Joanie D. Lambert, B.A., SKC; Alexandra R. Topper, MPH, SKC; Sunghoi Mccarroll, SKC; Leslie M. Barnard, MPH, SKC; Leilani Schwarcz, MPH, SKC; Jamie M. Emert, MPH, SKC; Christopher Drucker, PhD, SKC; Sally Guan, BA, SKC; Kosuke Kume, BS, SKC; Karen Rodriguez, SKC; Tracie Jacinto, SKC; Nicole Yarid, MD, King County Medical Examiner's Office; Betty Y. Yang, MD, UW; Catherine R. Counts, PhD, UW; David L. Murphy, MD, UW; Eric Yim, MD, EvergreenHealth; Sandra Kreider, MSN, EvergreenHealth; Dawn Barr, MSN, EvergreenHealth; Nancy Wilde, BSN, EvergreenHealth; Courtney Dorman, MSC, EvergreenHealth; Airin Lam, MSN, EvergreenHealth; Jeanette Harris, MS, EvergreenHealth; Hollianne Bruce, MPH, Snohomish Health District; Christopher Spitters, MD, Snohomish Health District; Rachael Zacks, MD, CDC; Jonathan Dyal, MD, CDC; Christina M. Carlson, PhD, CDC; Barbara Cooper, MSPH, CDC; Michelle Banks, MS, CDC; Heather P. McLaughlin, PhD, CDC; S. Arunmozhi Balajee, PhD, CDC; Christine Olson, MD, CDC; Suzanne Zane, DVM, CDC; Hammad Ali, MBBS, PhD, CDC; Jessica Healy, PhD, CDC; Kristine Schmit, MD, CDC; Kevin Spicer, MD, CDC; Zeshan Chisty, MPH, CDC; Sukarma Tanwar, MBBS, CDC; Joanne Taylor, PhD, CDC; Leisha D. Nolen, MD, CDC; Jeneita Bell, MD, CDC; Kelly Hatfield, MSPH, CDC; Melissa Arons, MSc, CDC; Anne Kimball, MD, CDC; Allison James, DVM, CDC; Mark Methner, PhD, CDC; Joshua M. Harney, MS, CDC
