# Supplementary material
Source: PubMed Central journal article supplement (PMC7121761)
Supplement: NEJMoa2005412_data-sharing.pdf [file NEJMoa2005412_data-sharing.pdf]

## Data Sharing Statement

McMichael TM, Currie DW, Clark S, et al. Epidemiology of Covid-19 in a Long-Term Care Facility in King County, Washington. N Engl J Med. DOI: 10.1056/NEJMoa2005412.

| Question                                                            | Authors' Response                                                                                                                        |
|---------------------------------------------------------------------|------------------------------------------------------------------------------------------------------------------------------------------|
| Will the data collected for your study be made available to others? | No                                                                                                                                       |
| Would you like to offer context for your decision?                  | This is an emergency response. Plans are not yet in place for any possible data sharing; however, data might be available in the future. |
| Which data?                                                         | —                                                                                                                                        |
| Additional information about data                                   | —                                                                                                                                        |
| How or where can the data be obtained?                              | —                                                                                                                                        |
| When will data availability begin?                                  | —                                                                                                                                        |
| When will data availability end?                                    | —                                                                                                                                        |
| Will any supporting documents be available?                         | —                                                                                                                                        |
| Which supporting documents?                                         | —                                                                                                                                        |
| Additional information about supporting documents                   | —                                                                                                                                        |
| How or where can supporting documents be obtained?                  | —                                                                                                                                        |
| When will supporting documents availability begin?                  | —                                                                                                                                        |
| When will supporting documents availability end?                    | —                                                                                                                                        |
| To whom will data be available?                                     | —                                                                                                                                        |
| For what type of analysis or purpose?                               | —                                                                                                                                        |
| By what mechanism?                                                  | —                                                                                                                                        |
| Any other restrictions?                                             | —                                                                                                                                        |
| Additional information                                              | —                                                                                                                                        |

This statement was posted on March 27, 2020, at NEJM.org.
